# Supplementary material for: Analytical Methods for the Characterization of Vegetable Oils
Source: MDPI journal article supplement (doi:10.3390/molecules28010153), 2022-12-24
Supplement: s1 [file s1]

Supplementary materials

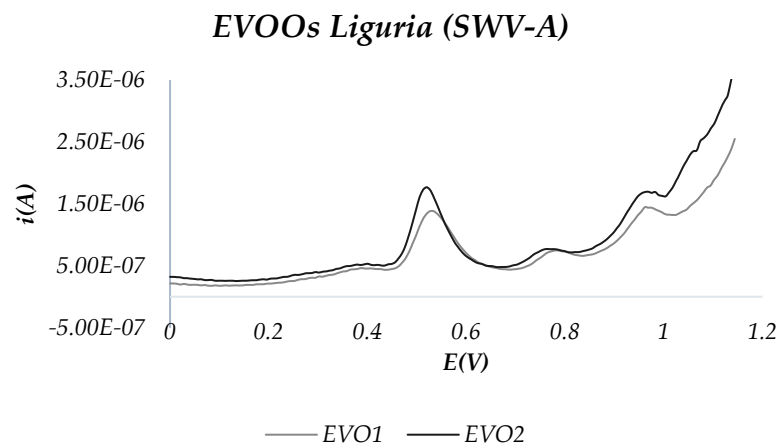

Figure S01 – SWV-A of Liguria oils

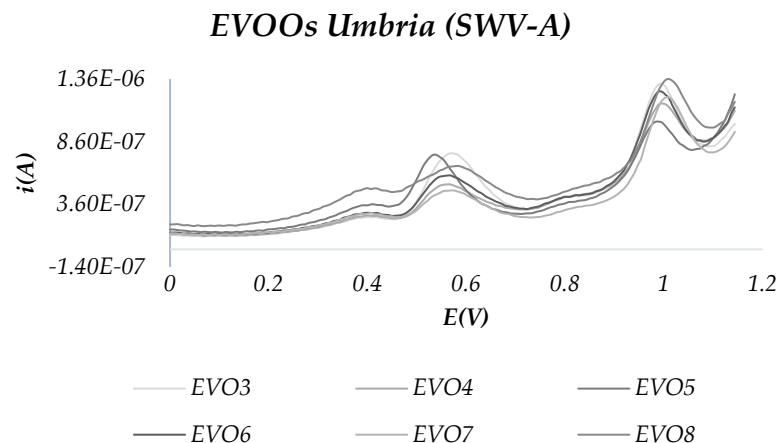

Figure S02 – SWV-A of Umbria oils

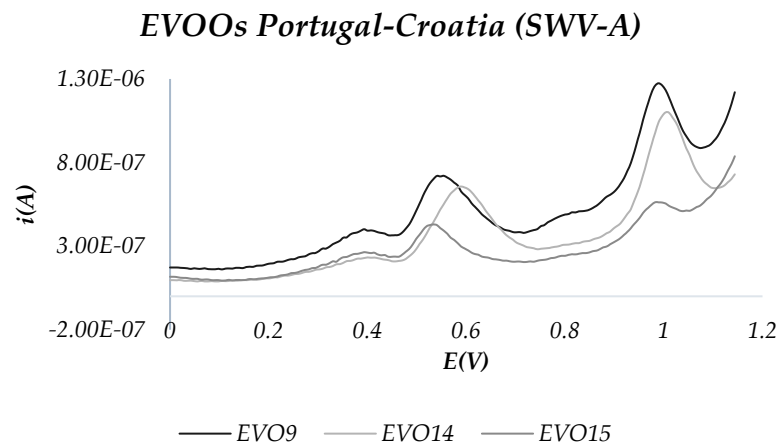

Figure S03 – SWV-A of EVOOs from Portugal and Croatia

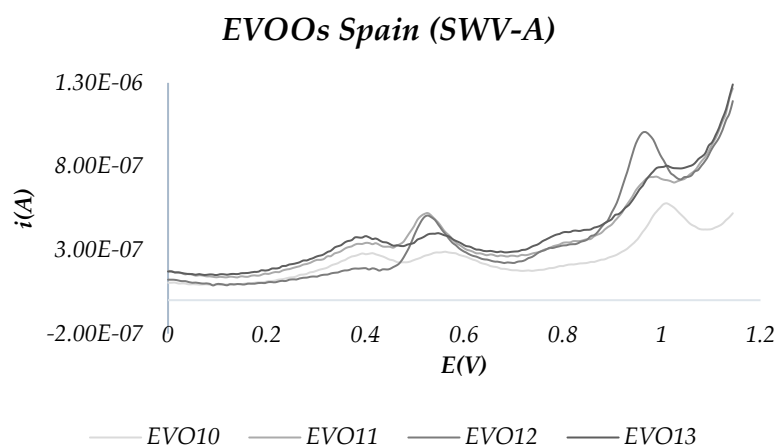

**Figure S04 – SWV-A of Spain oils**

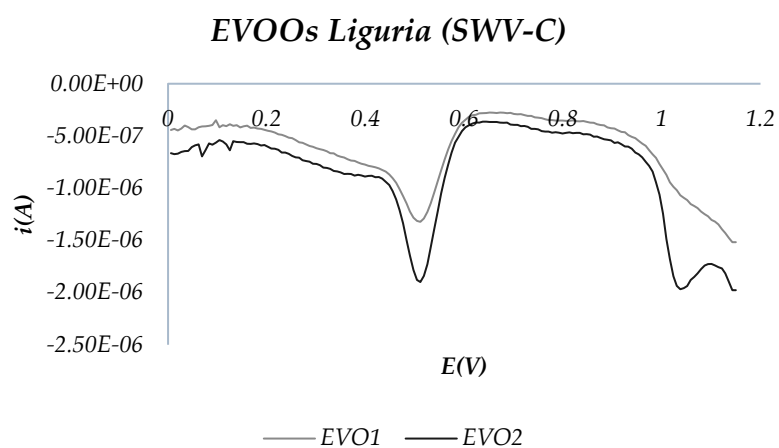

**Figure S05 – SWV-C of Liguria oils**

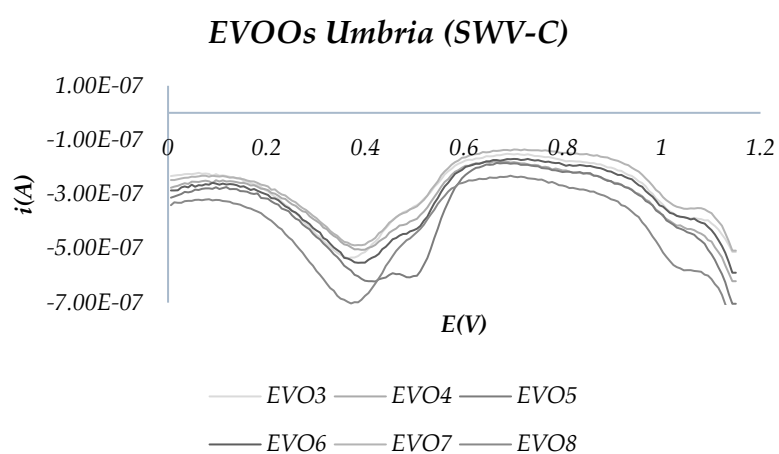

**Figure S06 – SWV-C of Umbria oils**

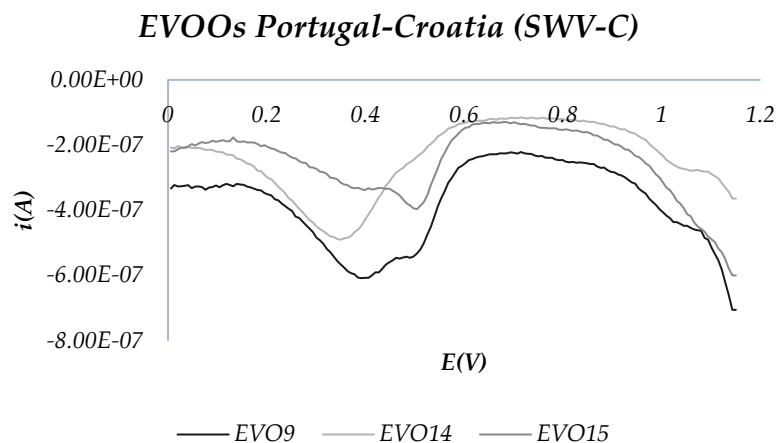

**Figure S07** – SWV-C of Portugal and Croatia oils

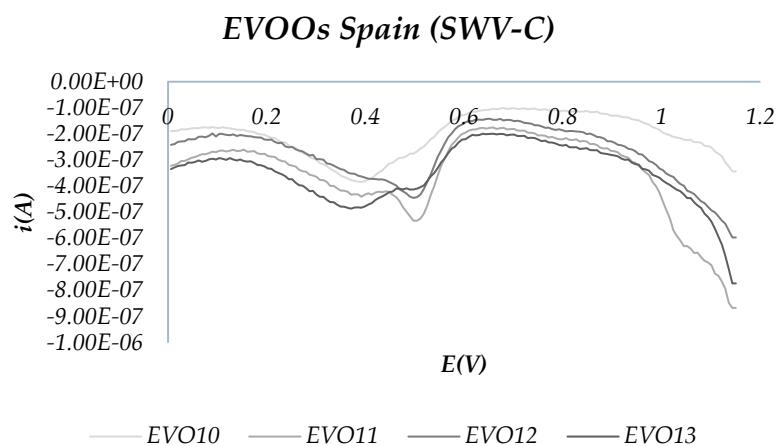

**Figure S08** – SWV-C of Spain oils

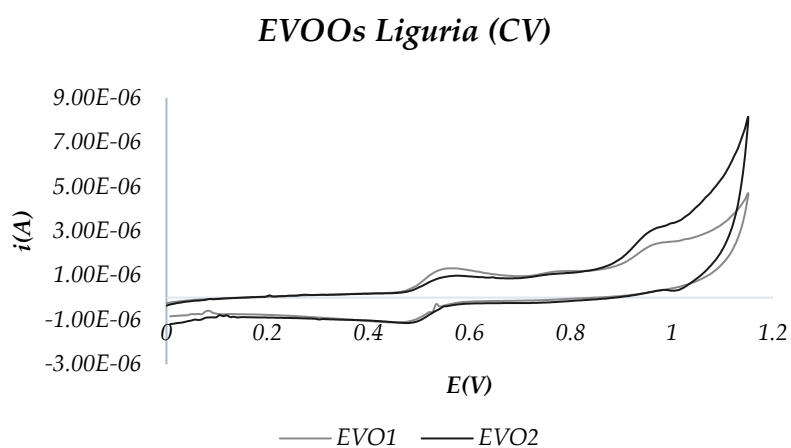

**Figure S09** – CV of Liguria oils

### *EVOOs Umbria (CV)*

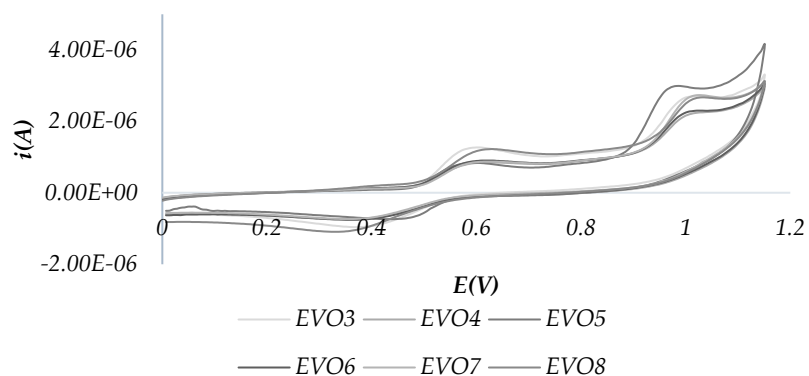

**Figure S10** – CV of Umbria oils

### *EVOOs Portugal and Croatia(CV)*

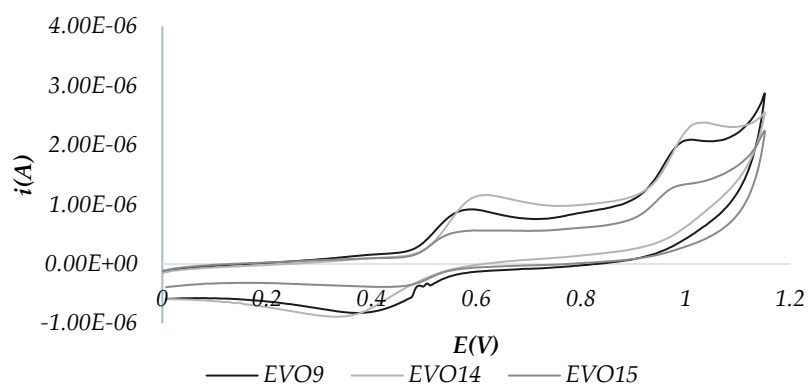

**Figure S11** – CV of Portugal and Croatia oils

### *EVOOs Spain (CV)*

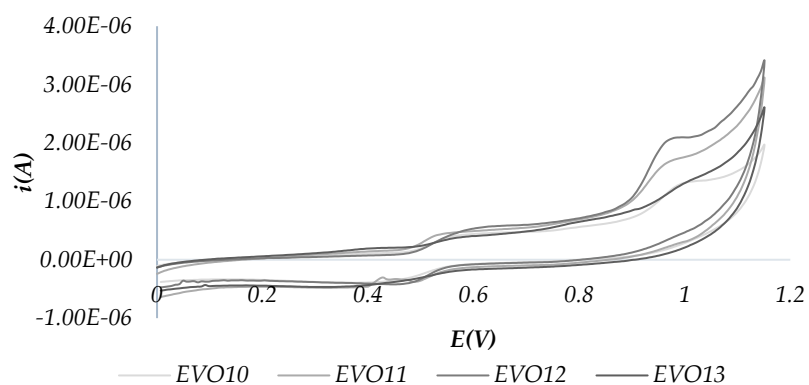

**Figure S12** – CV of Spain oils

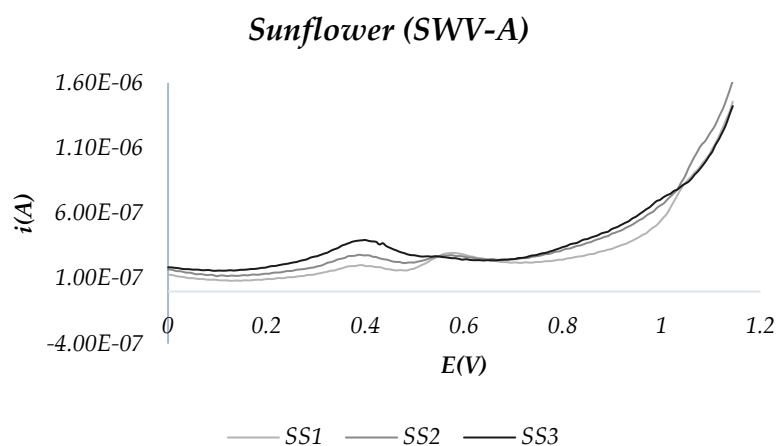

**Figure S13-** SWV-A of sunflower oils

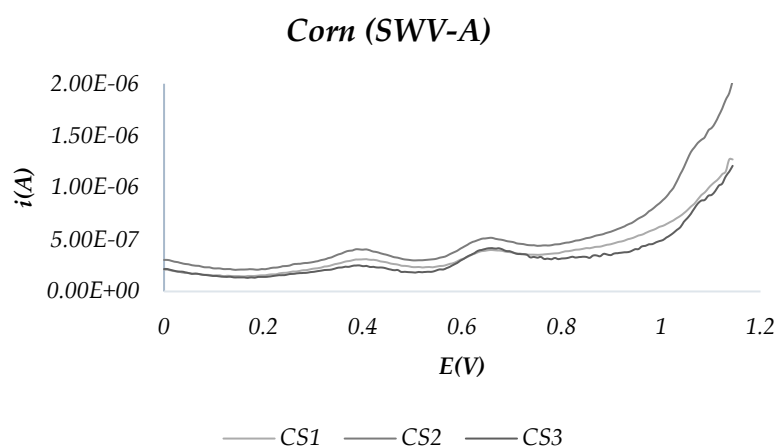

**Figure S14 -** SWV-A of corn seed oils

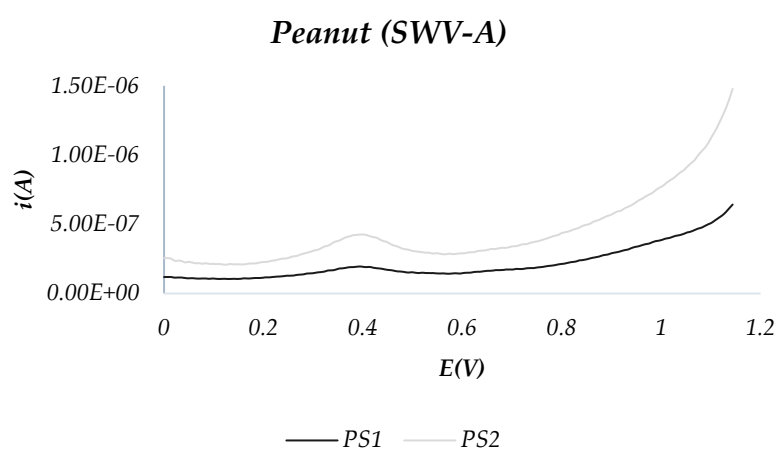

**Figure S15 –** SWV-A of peanut seed oils

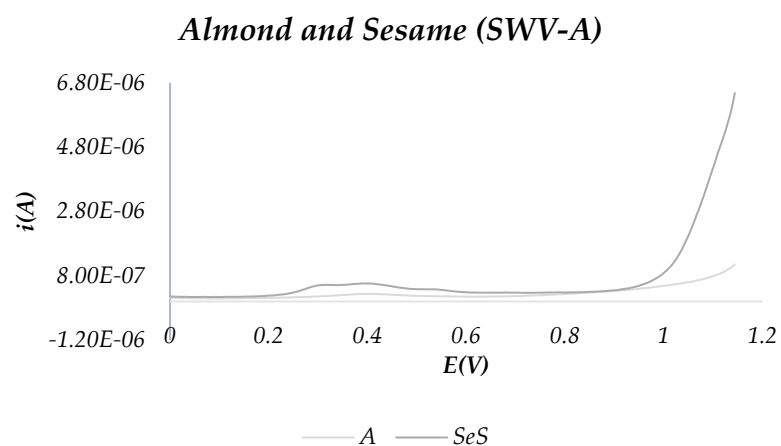

**Figure S16** – SWV-A of almond and sesame seed oils

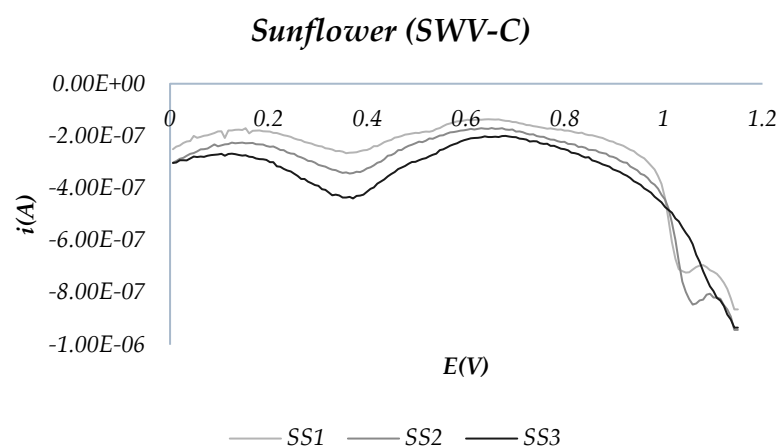

**Figure S17** – SWV-C of sunflower oils

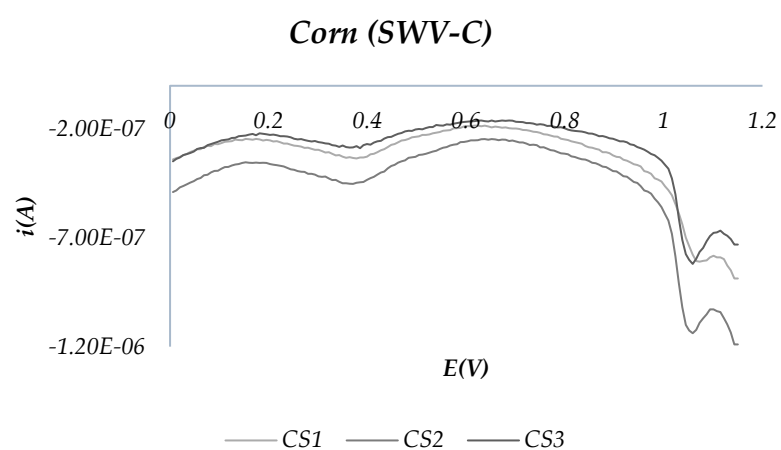

**Figure S18** – SWV-C of corn seed oils

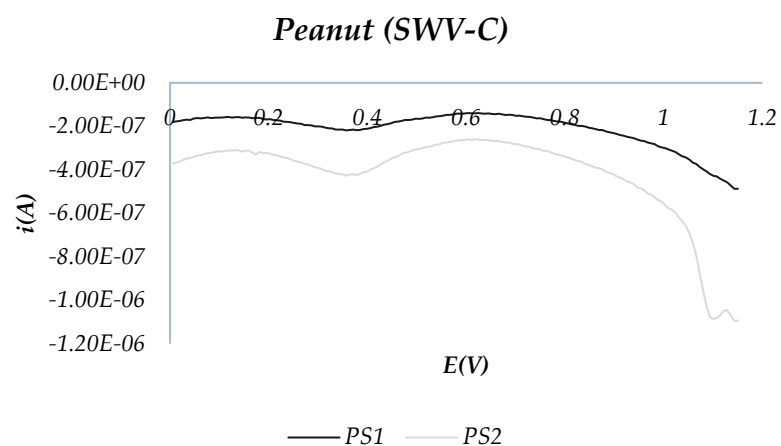

**Figure S19** – SWV-C of peanut oils

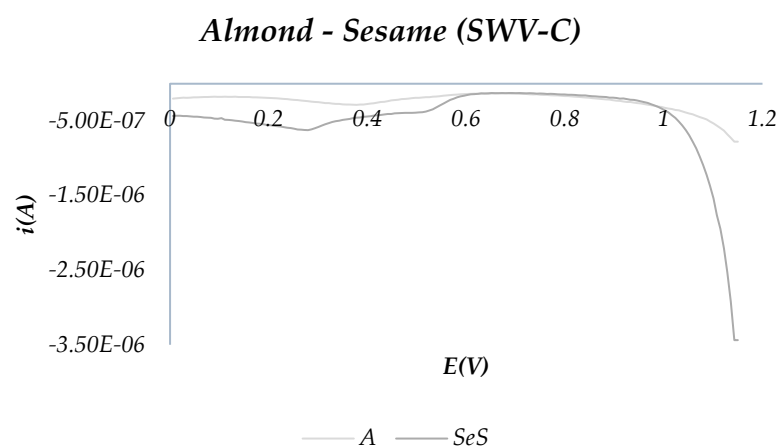

**Figure S20** – SWV-C of almond and sesame seed oils

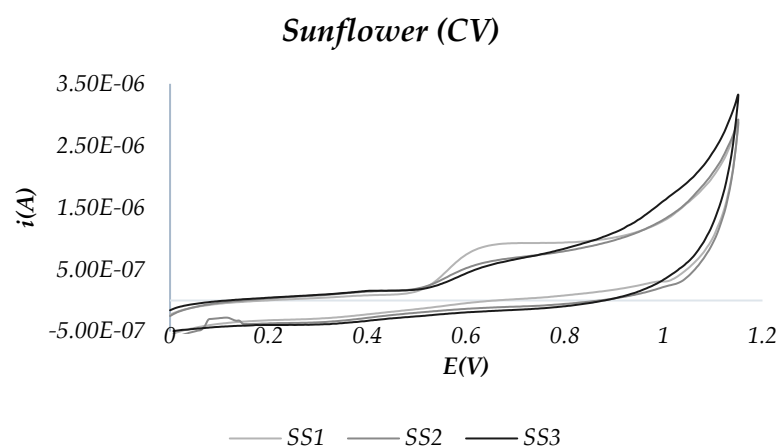

**Figure S21** - CV of sunflower seed oil

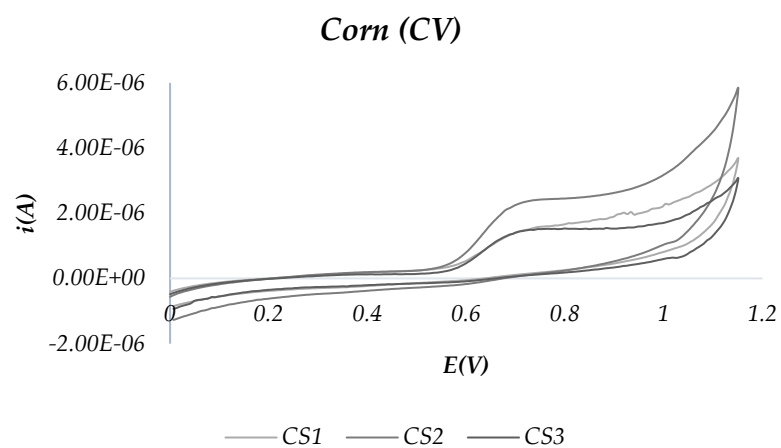

**Figure S22** – CV of corn seed oils

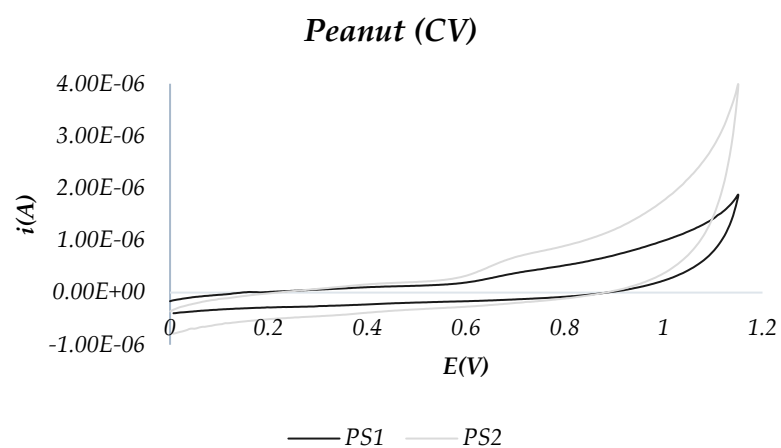

**Figure S23** – CV of peanut seed oils

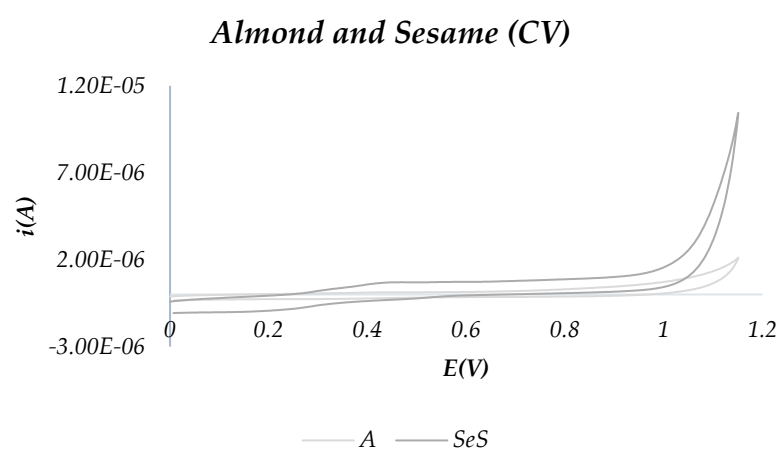

**Figure S24** – CV of almond and sesame seed oils
